# Supplementary material for: Robust Ni/WC superhydrophobic surfaces by electrodeposition
Source: Royal Society of Chemistry journal article supplement (doi:10.1039/c7ra08535d), 2017-01-01
Supplement: c7ra08535d1.pdf [file c7ra08535d1.pdf]

**Supporting Information for:**

**Robust Ni/WC superhydrophobic surfaces by electrodeposition**

Guochen Zhao,<sup>a,b,c</sup> Jinshang Li,<sup>b</sup> Yuanfeng Huang,<sup>d</sup> Liming Yang,<sup>b</sup> Ying Ye,<sup>d</sup> Frank C Walsh,<sup>c</sup> Jie Chen<sup>\*b</sup>  
and Shuncai Wang<sup>\*c</sup>

- Shandong Key Laboratory for High Strength Lightweight Metallic Materials, Jinan, 250000, China.*
- School of Environmental and Chemical Engineering, Shanghai University, Shanghai, 200444, China. Email: jchen@shu.edu.cn, Tel: +86(0)2166137482*
- National Centre for Advanced Tribology at Southampton (nCATS), University of Southampton, SO17 1BJ, UK. Email: wangs@soton.ac.uk, Tel: +44 (0)2380594638*
- Ocean College, Zhejiang University, 316021, China*

**Supporting figures**

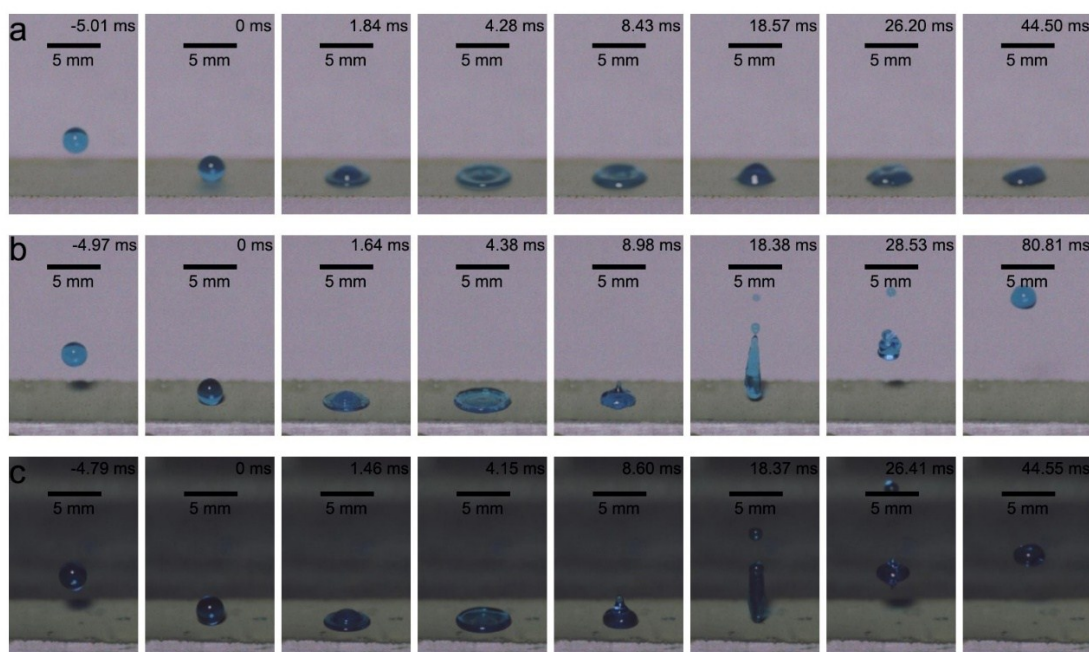

Figure S1. Selected snapshots from a water drop bouncing video. (a) Water drop on pure nickel coating; (b) Water drop on Ni/WC composite coating fabricated from deposition parameters of  $6 \text{ A dm}^{-2}$ ,  $20 \text{ g dm}^{-3}$ ,  $600 \text{ rpm}$ ; (c) Water drop on Ni/WC composite coating fabricated from deposition parameters of  $8 \text{ A dm}^{-2}$ ,  $20 \text{ g dm}^{-3}$ ,  $400 \text{ rpm}$ .

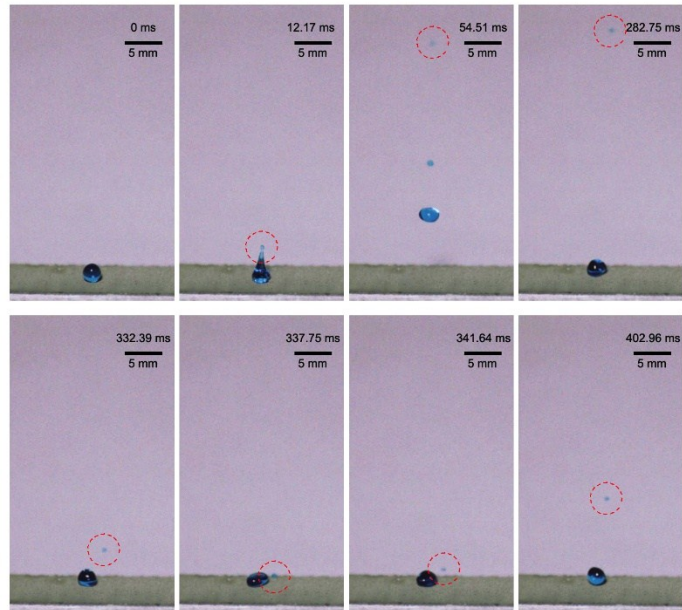

Figure S2. The movement of a droplet generated from large drop on the surface in video S2. This droplet was generated at 12.17 ms, retouch the surface at around 337.75 ms, and arrived its secondary maximum rebound height at 402.96 ms.
